# Supplementary material
Source: Research Square preprint supplement (doi:10.21203/rs.3.rs-9442500/v1)
Supplement: Supplementary file 1 [file be9c5daece9920c59bf5104e.docx]

# **Appendix B. Equilibrium selection under asymmetric blame**

**Setup and scope.** This appendix uses a standard adaptive best‑response dynamic with small implementation errors in the sense of Young (1993) and Kandori, Mailath and Rob (1993). For present purposes, we restrict attention to the two benchmark regimes  and  and to one‑step deviations that correspond to simple implementation errors by a single institutional actor. It sketches a simple equilibrium‑selection mechanism that formalizes how asymmetric blame and small implementation errors can stabilize punitive regimes even when harm‑reduction equilibria are Pareto‑superior.​

This appendix does not modify the stage game defined in Section 4 and Appendix A. It introduces a standard perturbed best-response dynamic (Young 1993; Kandori, Mailath and Rob 1993) solely to analyze equilibrium selection between the two Nash equilibria identified in Appendix A.

**B.1 Dynamic play with implementation errors**

Retain the stage game and payoffs from Section 4 and Appendix A, with action profile  and institutional players . Let  denote the set of best responses for player  given others’ actions  and parameter vector .​

Consider the following adaptive process:

1. Time is discrete, indexed by .
2. At each , a single institutional actor  is drawn uniformly at random to revise its action.​
3. With probability ,  chooses a best response from ; with probability , it “trembles” and chooses the other action in  for its dimension.​

For , this process defines an irreducible Markov chain over the finite state space , with a unique stationary distribution . As , the stochastically stable states (those with positive probability limits under ) provide an equilibrium‑selection prediction.

**B.2 Asymmetric blame and transition costs**

Under the parametric structure in Appendix A, the deterministic best‑response dynamics (when ) admit at least two Nash equilibria for empirically relevant : the punitive equilibrium  and the harm‑reduction equilibrium .​

**Assumption B7 (Coordination threshold in the punitive region).**
In the punitive parameter region, for any action profile with at most one component equal to 1, every other player’s myopic best response under the stage-game payoffs remains 0.

To compare their stochastic stability, we follow the standard “resistance” logic: a path from equilibrium  to equilibrium  requires some number of “mistakes” (trembles) against best responses, and the stochastically stable equilibrium is the one that can be reached from others via paths with minimal total resistance.

Formally, under asymmetric blame parameterizations, any minimal path in the perturbed process that moves from  to  requires weakly more non‑best‑response moves than any minimal path from  back to , so that the resistance of trees rooted at  is weakly lower than for trees rooted at , which is the usual sufficient condition for stochastic stability in this class of games.

Define the **one‑step resistance** of moving from profile  to  as:

- 0 if the deviation by the revising player is a best response at ;
- 1 if the deviation is not a best response (i.e., requires a tremble).

The **resistance** of a multi‑step path is the sum of its one‑step resistances.

Asymmetric blame is encoded in  and :

- In punitive configurations,  is large relative to , so small increases in diversion raise the court’s expected blame more than they reduce underweighted overdose cost.​
- Under low reimbursement and weak overdose weights,  and  are small, so MOUD and housing are privately costly and under‑rewarded.​

Under these conditions, Appendix A.2 showed that  is a Nash equilibrium: all one‑step deviations  are strictly unprofitable and thus require a tremble. Conversely, at  with punitive , at least some one‑step deviations  will be strictly profitable for one or more actors, so leaving  may require **zero** resistance moves (best responses) in the punitive direction.​

**B.3 Stochastic stability of punitive vs harm‑reduction regimes**

We can now state a simple selection result.

**Proposition B.1 (Punitive regime is stochastically stable under asymmetric blame).**
Suppose A1–A6 hold and  satisfies the punitive‑equilibrium conditions of Proposition 1. Assume further that:​

1. At , every unilateral deviation  for  strictly lowers the deviator’s payoff (all such moves require trembles).​
2. At , at least one actor  has a strict incentive to deviate to 0 in its own dimension (e.g., the court lowering diversion when  is high and  small).​

Then, under the adaptive process in B.1, the stochastically stable equilibrium as  is : the stationary distribution  concentrates on  in the limit.

*Intuition.* Moving from  to  requires at least three “upward” trembles (one for each actor to switch from 0 to 1 against its short‑run incentive), whereas moving from  back to  may require zero trembles if some actors find it strictly profitable to revert to punitive behavior given asymmetric blame and under‑funded harm‑reduction. The minimal‑resistance tree rooted at  therefore has lower total resistance than any tree rooted at , making  stochastically stable.​

**B.4 Realigning incentives and flipping selection**

Now consider the harm‑reduction‑friendly parameter vector described in Proposition 2: MOUD and housing reimbursement rates are high enough that , overdose and recidivism enter budgets via , and liability weights are rebalanced so that preventable overdose carries blame comparable to rare crimes by diverted individuals.​

Appendix A.3 showed that under such ,  is a Nash equilibrium: every unilateral move  strictly lowers the deviator’s payoff and thus requires a tremble, while at  at least some actors now have a strict incentive to deviate upward to 1 (e.g., corrections providing MOUD when under‑provision is heavily penalized and fully reimbursed).​

This yields the mirror selection result:

**Proposition B.2 (Harm‑reduction regime becomes stochastically stable once incentives are realigned).**
Under A1–A6 and the harm‑reduction‑friendly  of Proposition 2, assume:

1. At , every unilateral deviation  strictly lowers the deviator’s payoff (all such moves require trembles).​
2. At , at least one actor has a strict incentive to deviate upward in its own dimension (e.g., providing MOUD or MOUD‑inclusive housing).​

Then, under the adaptive process in B.1, the stochastically stable equilibrium as  is .

*Intuition.* With overdose‑sensitive funding and liability, moving from punitive to harm‑reduction requires at most one or two best‑response steps (some institutions now want to move toward 1), while moving back from harm‑reduction to punitive requires trembles against improved incentives and higher overdose‑related blame. The minimal‑resistance tree rooted at  now has lower resistance, so the process spends almost all its time near the harm‑reduction equilibrium.​​

**B.5 Interpretation**

This simple stochastic‑stability argument formalizes the claim in the main text that punitive regimes can be equilibrium‑selected by asymmetric blame and under‑funded harm‑reduction even when harm‑reduction equilibria are empirically superior. It also shows that relatively small but well‑targeted changes in funding, metrics, and liability weights can flip the direction of selection: once overdose and recidivism are sufficiently internalized in institutional payoffs, harm‑reduction becomes not only Pareto‑dominant but also risk‑dominant and stochastically stable.
