# Supplementary material
Source: Research Square preprint supplement (doi:10.21203/rs.3.rs-9442500/v1)
Supplement: Supplementary file 2 [file cfa99539247ae9326da9e607.docx]

# **Appendix A. Additional results and calibration details**

## **A.1 Simplified parametric environment (assumptions A1–A6)**

We work with a simplified parametric version of the environment in Section 4. Time is discrete, and each period corresponds to a full arrest–custody–housing–community cycle. A continuum of high‑risk individuals of unit mass faces per‑period overdose and crime probabilities  and  that depend on their state , the diversion, MOUD, and housing policies , and a latent risk type .​

We impose the following assumptions:

- **A1 (Monotone overdose risk).** For all  and all relevant states , overdose risk is weakly decreasing in MOUD and MOUD‑inclusive housing,
- **A2 (Monotone crime risk).** For all  and states , crime risk is weakly decreasing in stable, recovery‑oriented housing, with or without MOUD,
- **A3 (Cost functions).** Institutional cost functions  are increasing and convex in the intensity of diversion, MOUD, and recovery housing and separable from reputational and outcome terms as in Section 4.​
- **A4 (Blame asymmetry).** The court–prosecutor actor  attaches higher blame weight to salient crimes by diverted individuals than to overdose events in custody or shortly after release, while the correctional actor  attaches higher blame weight to in‑custody or immediately post‑release overdose than to community crime.​
- **A5 (Funding and liability parameters).** The funder–regulator chooses a parameter vector  of payment rates , performance weights , and liability weights  that enter institutional payoffs linearly as in Section 4.​
- **A6 (Small frictions, multiple best responses).** For at least one empirically relevant configuration of , the best‑response correspondences of the institutional actors admit two distinct fixed points, corresponding to the punitive and harm‑reduction profiles described below.​

These assumptions formalize the qualitative relationships used in the main text while keeping the functional forms tractable.​

## **Conventions.** The expressions for  and  and the cost terms in this appendix use linear reduced forms in the policy variables (for example, ). These should be read as stylized local approximations that capture the empirically observed direction and rough magnitude of effects, not as literal structural relationships derived from micro‑data.

## **A.2 Proposition 1 (punitive equilibrium)**

We retain assumptions A1–A6 and now specify simple linear‑quadratic payoffs consistent with the main text. Let the institutional action profile be , where  denote diversion, MOUD, and MOUD‑inclusive housing, respectively.​

For each institutional actor  (court–prosecutor, corrections, housing–treatment), define the per‑period payoff

where:​

- is a direct cost term,
- is a “blame” term weighted by ,
- and  are population overdose and crime rates induced by ,
- reflect any intrinsic or imposed concern for overdose and crime.​

Parametric structure

Assume:

1. Direct costs. For each ,

with , and net marginal costs under low reimbursement

where  are per‑unit MOUD and housing payments determined by .​

1. Blame terms. For simplicity, take

where  is crime attributable to diverted individuals and  are overdose components attributable to each actor’s domain. Assumption A4 implies​

1. Outcome functions. Let

with , capturing that MOUD and housing reduce overdose and that diversion and housing reduce crime on average. Similarly decompose:​

with .​

Given  with low MOUD/housing payments and high blame for crimes by diverted individuals at the court node (Proposition‑1 conditions), we have:

- for all  (MOUD and housing are privately costly).
- is large relative to , so the court strongly dislikes increasing .​

Best‑response calculations

Fix others’ actions and compute each actor’s gain from deviating from 0 to 1 in its own dimension.

1. Court–prosecutor : choice of .

Holding  fixed, the payoff difference from switching  from 0 to 1 is

Using the linear forms above,

Hence

Rearranging,

Under the punitive‑parameter conditions, we can pick  large and  small such that

so  and the best response is .​

1. Corrections : choice of .

Holding  fixed, the payoff difference from switching  from 0 to 1 is

Using  and ,

Under low reimbursement,  is sizeable, and if  and  are not too large (i.e., overdose is under‑internalized), we can have

implying  and best response .​

1. Housing–treatment : choice of .

Similarly, holding  fixed,

With  and ,

Again, with  and modest , we can parameterize so that

making  a best response.​

Mutual best response and equilibrium

Evaluated at , the inequalities above state that

Thus, for each actor, deviating unilaterally from 0 to 1 in its own decision lowers its payoff given that others play 0. By definition of a stationary Nash equilibrium in this static representation of the stage game, the action profile​

is an equilibrium, which we identify as the punitive equilibrium.

**Lemma A.1 (Coexistence of punitive and harm‑reduction equilibria, parametric illustration).** There exist open sets of parameter vectors  such that the inequalities in Propositions 1 and 2 are both satisfied, so that  and  are both stationary equilibria.

*Sketch.* The best‑response conditions in Propositions 1 and 2 are strict inequalities in the underlying parameters. Each defines an open region in parameter space. Because the inequalities for the punitive and harm‑reduction profiles are continuous in , we can choose  so that (i) low outcome weights and low MOUD/housing payments make  a best response for each actor, and (ii) sufficiently higher outcome weights and MOUD/housing payments make  a best response, with an overlap region where both profiles satisfy the best‑response inequalities. The purpose is illustrative: the model admits multiple equilibria for empirically plausible but distinct parameterizations rather than claiming a full characterization of the joint parameter set.

**A.3 Proposition 2 (harm‑reduction equilibrium)**

In what follows, we work with the stylized calibration in Section 6 and treat the social planner’s weights  as free parameters within empirically reasonable ranges.

We retain the payoff structure

and the linear forms for , , and  from Appendix A.2, with .​

Under **harm‑reduction‑friendly** parameters , the funder–regulator raises MOUD and housing reimbursement and strengthens overdose‑sensitive performance and liability weights so that:

- Net marginal costs turn nonpositive:

for all .​

- Liability and outcome weights on overdose and recidivism are nontrivial:

We show that at , each actor prefers its harm‑reduction action to deviating unilaterally to 0, i.e. , so  is a mutual best response.​

As before, write the difference in payoffs for actor  from switching its own decision from 0 to 1, holding others fixed, as .​

**Court–prosecutor : choice of**

Fix  (others playing harm‑reduction). Consider the move .

Direct cost term:

where  may be positive or small if diversion reimbursement is partial.​

Blame term:

so  (less crime‑related blame when more people are successfully diverted).​

Outcome terms:

with  if diversion does not increase overdose on net under harm‑reduction conditions.​

The payoff difference is

Substituting,

Under the harm‑reduction‑friendly , we can have:

- small or nonpositive (diversion is reimbursed or nearly cost‑neutral),
- large enough, and
- nonzero with ,

so that

implying . Thus, given , the best response is .​

**Corrections : choice of**

Fix . Consider the move .

Direct cost term:

by assumption (MOUD is at least fully reimbursed at the margin).​

Blame term:

so .​

Outcome terms (population):

under the reduced‑form calibration.​

Then

Since  and , we have

so . Thus, given , the best response is .​

**Housing–treatment : choice of**

Fix . Consider the move .

Direct cost term:

if MOUD‑inclusive housing is adequately reimbursed.​

Blame term:

so .​

Outcome terms:

since housing reduces both overdose and crime at the population level.​

Thus

Because  and all other coefficients are positive, we have

so . Given , the best response is .​

**Mutual best response and equilibrium**

Evaluated at the harm‑reduction profile , the inequalities above show that, for each actor ,

i.e., deviating unilaterally from 1 to 0 in its own decision lowers its payoff, holding others at 1. Therefore,​

is a stationary Nash equilibrium of the stage game, which we identify as the **harm‑reduction equilibrium**.

**A.4 Proposition 3 (Pareto dominance and risk dominance)**

**Definition (risk dominance).** Throughout, we use *risk dominance* in an evolutionary/selection sense: given the perturbed best-response process with small implementation errors defined in Appendix B (following Young 1993; Kandori, Mailath and Rob 1993), an equilibrium is *risk-dominant* if it is *stochastically stable* as the tremble probability . Intuitively, this is the equilibrium with the larger basin of attraction under best-response dynamics once small mistakes and pessimistic beliefs about others’ actions are admitted.

Under the empirical magnitudes discussed in Section 6 and the parametric restrictions above:

1. The harm‑reduction equilibrium  Pareto‑dominates the punitive equilibrium  for the funder–regulator and for all actors whose payoffs place positive weight on overdose and recidivism outcomes.​
2. For parameter configurations in which blame for salient crimes remains highly asymmetric and information about others’ actions is noisy, the punitive equilibrium  can remain risk‑dominant in the sense of A.4, even when  is Pareto‑superior.​

*Sketch of proof.* For part (1), let  and  denote the calibrated changes in aggregate overdose and crime rates when moving from the punitive to the harm‑reduction regime. The funder–regulator’s payoff difference can be written as​

where  is the incremental program cost of MOUD and housing and  are the planner’s weights on overdose and crime.​ Section 6’s calibration implies that, for plausible parameter values,  is large (e.g., on the order of a 60–70 percent reduction in overdose deaths for the high‑risk cohort), while  is weakly negative or small, and  is modest relative to the social value .​ Choosing  and  within conventional ranges then yields

so  and the harm‑reduction regime strictly improves the funder’s payoff. The same logic applies to any actor whose payoff includes a term  with : if the overdose/crime reductions are large enough relative to the incremental costs in , then .​

For part (2), fix parameters in the “punitive” region of Appendix A where  and  are both Nash equilibria. Under asymmetric blame, a court or housing provider that deviates unilaterally from 0 to 1 in an otherwise punitive profile faces a high perceived cost from being the only adopter of a harm‑reduction action (e.g., blame for any crime by a diverted or housed person) and captures only a fraction of the overdose benefits, which are spread across institutions. With noisy beliefs about others’ actions and small implementation errors, this makes deviations toward harm‑reduction unattractive when others are expected to remain punitive, whereas deviations back toward punitive behavior from  can be privately profitable for some actors. Under the perturbed best‑response process in Appendix B, this translates into higher “resistance” for paths from  to  than for paths from  to , so that the minimal‑resistance tree is rooted at  and the punitive equilibrium is stochastically stable in the sense of A.4, despite the Pareto dominance of .

**A.5 Empirical magnitudes and interpretation**

The empirical calibration in Section 6 provides one concrete set of magnitudes consistent with the assumptions and propositions above. Using effect sizes from Rhode Island’s statewide MOUD‑in‑corrections program and Massachusetts’ Chapter 208 jail pilots, a move from punitive to harm‑reduction regimes can be modeled as reducing annual overdose mortality among a high‑risk cohort from roughly 10 percent to around 3 percent, with associated reductions in reincarceration and improvements in treatment continuity. Recovery housing evaluations suggest that adding MOUD‑inclusive, reasonably supportive housing further improves abstinence, employment, and criminal‑legal outcomes at per‑person costs that are small relative to the social cost of overdose. Under conventional valuations of overdose deaths and plausible program costs, these magnitudes make it straightforward to parameterize , , and  so that  is both Pareto‑superior and, once incentives are realigned, risk‑dominant for the relevant institutional actors.
